# Supplementary material for: Regulatory mechanism of HIF-1α and its role in liver diseases: a narrative review
Source: PubMed Central journal article supplement — Ann Transl Med. 2022 Jan;10(2):109. doi: 10.21037/atm-21-4222 (PMC8848434; doi:10.21037/atm-21-4222), 2022-01
Supplement: atm-10-02-109-rc.pdf [file atm-10-02-109-rc.pdf]

## Narrative Review Checklist

| Section/Topic             | Item No | Item                                                                                                                                                                                                                                                                                 | Reported on Page Number/Line Number | Reported on Section/Paragraph |
|---------------------------|---------|--------------------------------------------------------------------------------------------------------------------------------------------------------------------------------------------------------------------------------------------------------------------------------------|-------------------------------------|-------------------------------|
| <b>TITLE</b>              |         |                                                                                                                                                                                                                                                                                      |                                     |                               |
| Title                     | 1       | Identify the report as a Narrative Review or Literature Review.                                                                                                                                                                                                                      | Page1/Line1-2                       | Title/Paragraph1-2            |
| <b>ABSTRACT</b>           |         |                                                                                                                                                                                                                                                                                      |                                     |                               |
| Structured summary        | 2       | Provide a structured summary with the subsections as: objective, background, methods, conclusion (1).                                                                                                                                                                                | Page2/Line20-37                     | Abstract/Paragraph1-4         |
| <b>INTRODUCTION</b>       |         |                                                                                                                                                                                                                                                                                      |                                     |                               |
| Rationale/background      | 3       | Describe the rationale for the review in the context of what is already known.                                                                                                                                                                                                       | Page3/Line41-56                     | Introduction/Paragraph1-2     |
| Objectives                | 4       | Specify the key question(s) identified for the review topic.                                                                                                                                                                                                                         | Page3/Line57-63                     | Introduction/Paragraph3       |
| <b>METHODS</b>            |         |                                                                                                                                                                                                                                                                                      |                                     |                               |
| Research selection        | 5       | Specify the process for identifying the literature search (eg, years considered, language, publication status, study design, and databases of coverage).                                                                                                                             | Page6/Line130-132                   | Methods/Paragraph2            |
| <b>DISCUSSION/SUMMARY</b> |         |                                                                                                                                                                                                                                                                                      |                                     |                               |
| Narrative                 | 6       | Discuss: 1) research reviewed including fundamental or key findings, 2) limitations and/or quality of research reviewed, and 3) need for future research.                                                                                                                            | Page12-13/Line284-292               | Discussion/Paragraph3         |
| Summary                   | 7       | Provide an overall interpretation of the narrative review in the context of clinical practice and/or the Nutrition Care Process for registered dietitian nutritionists, clinical practice for other health professionals, policy development and implementation, or future research. | Page13/Line295-299                  | Summary/Paragraph2            |

### Reference

1. Green BN, Johnson CD, Adams A. Writing narrative literature reviews for peer-reviewed journals: secrets of the trade. J Sports Chiropr Rehabil 2001;15:5–19.

Article information: <https://dx.doi.org/10.21037/atm-21-4222>

\*As the checklist was provided upon initial submission, the page number/line number reported may be changed due to copyediting and may not be referable in the published version. In this case, the section/paragraph may be used as an alternative reference.
